# Supplementary material for: Serum 25-Hydroxyvitamin D Concentration Is Independently Inversely Associated with Insulin Resistance in the Healthy, Non-Obese Korean Population
Source: PubMed Central journal article supplement — Diabetes Metab J. 2016 Jul 26;40(5):367–75. doi: 10.4093/dmj.2016.40.5.367 (PMC5069393; doi:10.4093/dmj.2016.40.5.367), 2016-07-26
Supplement: dmj-40-367-s001.pdf [file dmj-40-367-s001.pdf]

**Supplementary Table 1.** Numbers of participants with high insulin resistance (>75 percentile) by tertiles

| High insulin resistance   |            |
|---------------------------|------------|
| General obesity           |            |
| T3 of 25(OH)D and normal  | 50 (12.3)  |
| T3 of 25(OH)D and obesity | 76 (37.3)  |
| T2 of 25(OH)D and normal  | 47 (12.7)  |
| T2 of 25(OH)D and obesity | 104 (46.2) |
| T1 of 25(OH)D and normal  | 63 (16.8)  |
| T1 of 25(OH)D and obesity | 111 (48.9) |
| Abdominal obesity         |            |
| T3 of 25(OH)D and normal  | 72 (14.8)  |
| T3 of 25(OH)D and obesity | 54 (43.9)  |
| T2 of 25(OH)D and normal  | 73 (16.0)  |
| T2 of 25(OH)D and obesity | 78 (56.1)  |
| T1 of 25(OH)D and normal  | 90 (19.7)  |
| T1 of 25(OH)D and obesity | 84 (58.3)  |

Values are presented as number (%).  
T, tertiles; 25(OH)D, 25-hydroxyvitamin D.
